# Supplementary material for: Preventing acute gut wall damage in infectious diarrhoeas with glycosylated dendrimers
Source: PubMed Central journal article supplement (PMC3491821; doi:10.1002/emmm.201201290), 2012-08-06
Supplement: emmm0004-0866-SD1.pdf [file emmm0004-0866-SD1.pdf]

Manuscript EMM-2012-01290

## Preventing acute gut wall damage in infectious diarrhoeas with glycosylated dendrimers

Ian Teo, Steve M. Toms, Benoit Marteyn, Teresa S. Barata, Peter Simpson, Karen A. Johnston, Pamela Schnupf, Andrea Puhar, Tracey Bell, Chris Tang, Mire Zloh, Steve Matthews, Phillip M. Rendle, Philippe J. Sansonetti, and Sunil Shaunak

*Corresponding author: Sunil Shaunak, Imperial College London*

---

### Review timeline:

Submission date:

15 February 2012

Accepted:

22 June 2012

---

### Transaction Report:

No Peer Review Process File is available with this article, as the authors have chosen not to make the review process public in this case.
